# Supplementary material for: A self-made portable separation device based on 2-D MOF nanosheets for the efficient separation of dyes in solutions
Source: Royal Society of Chemistry journal article supplement (doi:10.1039/d1ce00251a), 2021-01-01
Supplement: d1ce00251a1.pdf [file d1ce00251a1.pdf]

Electronic supplementary information

**A self-made portable separation device based on 2-D MOFs  
nanosheet for the efficient separation of dyes in solutions**

Anqi Li<sup>a</sup>, Xiaofan Ma<sup>a</sup>, Jie Ma<sup>b</sup>, Qingyi Yuan<sup>a</sup>, Jun Zhang<sup>b,c,\*</sup>, Xiaopeng Xuan<sup>a,\*</sup>

*a* Henan Key Laboratory of Green Chemistry, Collaborative Innovation Center of Henan Province for Green Manufacturing of Fine Chemicals, Key Laboratory of Green Chemical Media and Reactions, Ministry of Education, School of Chemistry and Chemical Engineering, Henan Normal University, Xinxiang 453007, P. R. China

*b* School of Materials and Chemical Engineering, Anhui Jianzhu University, Hefei 230601, P. R. China

*c* State Key Laboratory of Plateau Ecology and Agriculture, New Energy Photovoltaic Industry Research Center, Qinghai University, Xining 810006, P. R. China

**Table S1** Crystallographic data and structural refinement data for **M-1**

| Crystal data                                                                                                   |                                                                                                                                                                                              |
|----------------------------------------------------------------------------------------------------------------|----------------------------------------------------------------------------------------------------------------------------------------------------------------------------------------------|
| Chemical formula                                                                                               | C <sub>28</sub> H <sub>20.78</sub> Cu <sub>2</sub> N <sub>2</sub> O <sub>10</sub> ·1.25(C <sub>3</sub> H <sub>7</sub> NO)                                                                    |
| <i>M</i> <sub>r</sub>                                                                                          | 763.71                                                                                                                                                                                       |
| Crystal system, space group                                                                                    | Orthorhombic, <i>Pnna</i>                                                                                                                                                                    |
| Temperature (K)                                                                                                | 293                                                                                                                                                                                          |
| <i>a</i> , <i>b</i> , <i>c</i> (Å)                                                                             | 24.2305 (8), 18.3074 (8), 17.7842 (6)                                                                                                                                                        |
| <i>V</i> (Å <sup>3</sup> )                                                                                     | 7862.0 (6)                                                                                                                                                                                   |
| <i>Z</i>                                                                                                       | 8                                                                                                                                                                                            |
| Radiation type                                                                                                 | Cu <i>K</i> α                                                                                                                                                                                |
| μ (mm <sup>-1</sup> )                                                                                          | 1.81                                                                                                                                                                                         |
| Data collection                                                                                                |                                                                                                                                                                                              |
| Diffractometer                                                                                                 | XtaLAB Synergy, Dualflex, HyPix diffractometer                                                                                                                                               |
| Absorption correction                                                                                          | Multi-scan<br><i>CrysAlis PRO</i> 1.171.39.34b (Rigaku Oxford Diffraction, 2017) Empirical absorption correction using spherical harmonics, implemented in SCALE3 ABSPACK scaling algorithm. |
| <i>T</i> <sub>min</sub> , <i>T</i> <sub>max</sub>                                                              | 0.607, 1.000                                                                                                                                                                                 |
| No. of measured, independent and observed [ <i>I</i> > 2σ( <i>I</i> )] reflections                             | 22234, 6217, 3210                                                                                                                                                                            |
| <i>R</i> <sub>int</sub>                                                                                        | 0.096                                                                                                                                                                                        |
| (sin θ/λ) <sub>max</sub> (Å <sup>-1</sup> )                                                                    | 0.575                                                                                                                                                                                        |
| Refinement                                                                                                     |                                                                                                                                                                                              |
| <i>R</i> [ <i>F</i> <sup>2</sup> > 2σ( <i>F</i> <sup>2</sup> )], <i>wR</i> ( <i>F</i> <sup>2</sup> ), <i>S</i> | 0.107, 0.259, 1.16                                                                                                                                                                           |
| No. of reflections                                                                                             | 6217                                                                                                                                                                                         |
| No. of parameters                                                                                              | 656                                                                                                                                                                                          |
| No. of restraints                                                                                              | 1219                                                                                                                                                                                         |
| H-atom treatment                                                                                               | H-atom parameters constrained                                                                                                                                                                |
| Δρ <sub>max</sub> , Δρ <sub>min</sub> (e Å <sup>-3</sup> )                                                     | 1.62, -0.68                                                                                                                                                                                  |

**Table S2** Bond lengths and bond angles for C-H...O weak interactions in **M-1**

| <i>D</i> —H... <i>A</i>       | <i>D</i> —H | H... <i>A</i> | <i>D</i> ... <i>A</i>   | <i>D</i> —H... <i>A</i> |
|-------------------------------|-------------|---------------|-------------------------|-------------------------|
| C27—H27A...O9 <sup>i</sup>    | 0.96        | 2.63          | 3.326 <sup>□</sup> (16) | 130.0                   |
| C27—H27B...O6 <sup>i</sup>    | 0.96        | 2.81          | 3.309 <sup>□</sup> (14) | 113.5                   |
| C26—H26...O4                  | 0.93        | 2.55          | 3.052 <sup>□</sup> (12) | 114.0                   |
| C13—H13...O5 <sup>ii</sup>    | 0.93        | 2.35          | 2.876 <sup>□</sup> (17) | 115.9                   |
| C15—H15C...O10 <sup>iii</sup> | 0.96        | 2.92          | 3.43 <sup>□</sup> (2)   | 114.3                   |
| C27A—H27E...O9 <sup>i</sup>   | 0.96        | 2.48          | 3.39 <sup>□</sup> (3)   | 157.9                   |
| C26A—H26A...O9 <sup>ii</sup>  | 0.93        | 2.33          | 2.85 <sup>□</sup> (2)   | 114.7                   |

Symmetry codes: (i)  $-x+1, -y+2, -z+1$ ; (ii)  $x-1/2, y, -z+1$ ; (iii)  $x, -y+3/2, -z+1/2$ .

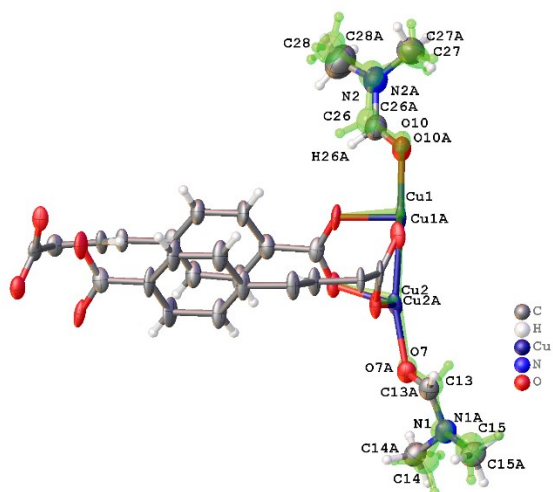

**Fig. S1** The disorders of  $\text{Cu}^{2+}$  and two DMF molecules in the refinements.

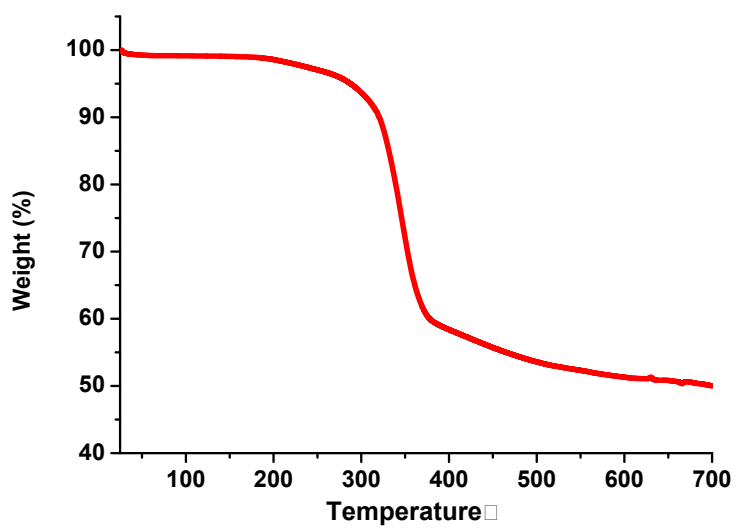

**Fig. S2** TG analysis of M-1

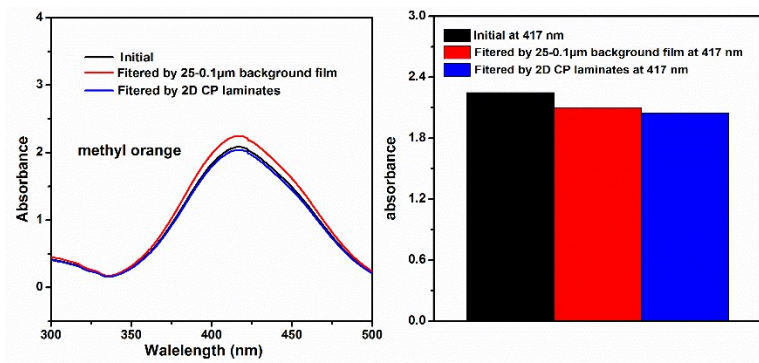

(a)

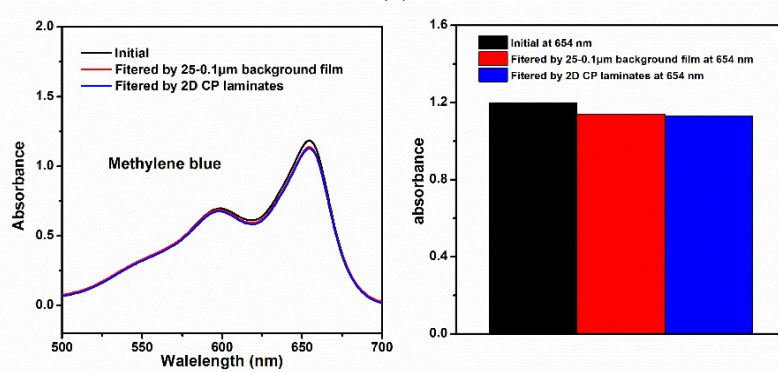

(b)

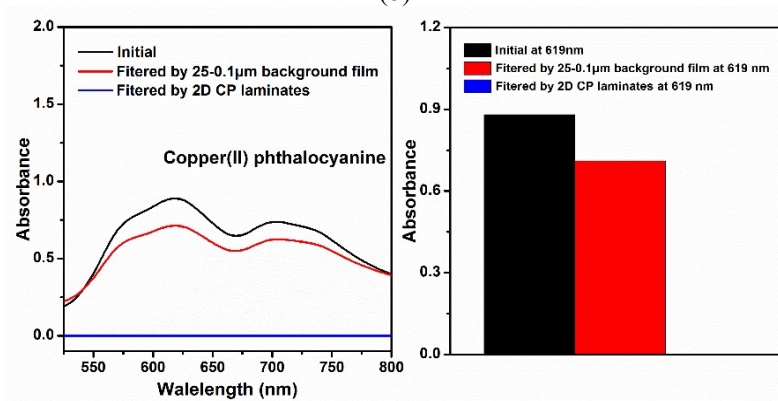

(c)

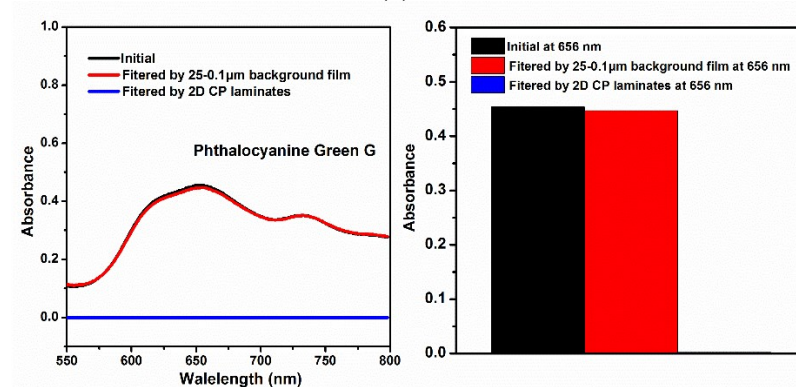

(d)

Fig. S3 UV-vis spectra of dyes solution before and after filtration (a–d) and dye removal rates of laminated **M-1**.
